# Supplementary material for: Zr- and Hf-based nanoscale metal–organic frameworks as contrast agents for computed tomography
Source: Royal Society of Chemistry journal article supplement (doi:10.1039/c2jm32299d), 2012-01-01
Supplement: c2jm32299d.pdf [file c2jm32299d.pdf]

Supplementary Information for:

## Zr- and Hf-based Nanoscale Metal-Organic Frameworks as Contrast Agents for Computed Tomography

Kathryn E. deKrafft,<sup>a</sup> William S. Boyle,<sup>a</sup> Laurel M. Burk,<sup>b</sup> Otto Z. Zhou,<sup>b</sup> and Wenbin Lin<sup>a,\*</sup>

<sup>a</sup>Department of Chemistry, CB# 3290, University of North Carolina, Chapel Hill, NC 27599

<sup>b</sup>Department of Physics and Astronomy, University of North Carolina, Chapel Hill, NC 27599

\*To whom correspondence should be addressed. E-mail: wlin@unc.edu

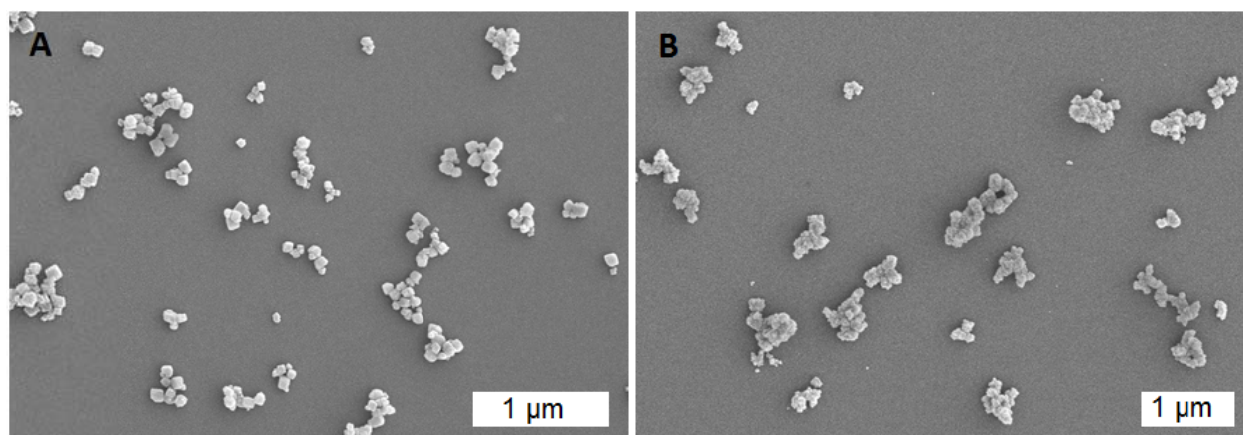

**Figure S1.** SEM images of (A) Zr-UiO and (B) Hf-UiO.

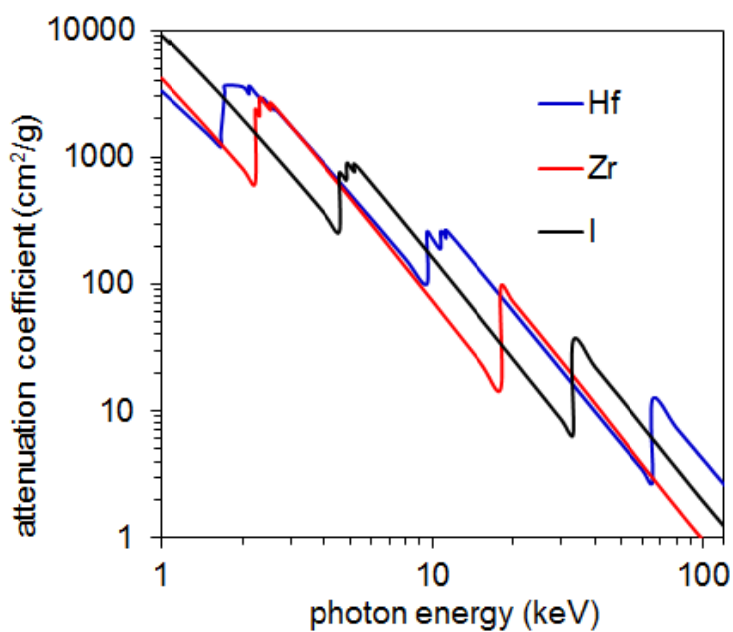

**Figure S2.** Attenuation coefficient vs. photon energy for Hf, Zr, and I, reproduced from data reported by NIST. Here the attenuation is expressed in  $\text{cm}^2/\text{g}$  units on a logarithmic scale. In Fig. 2E, it is expressed in  $\text{mol}^{-1}$  units on a linear scale, for easy visualization of the relative attenuation of these elements at the relevant energies.

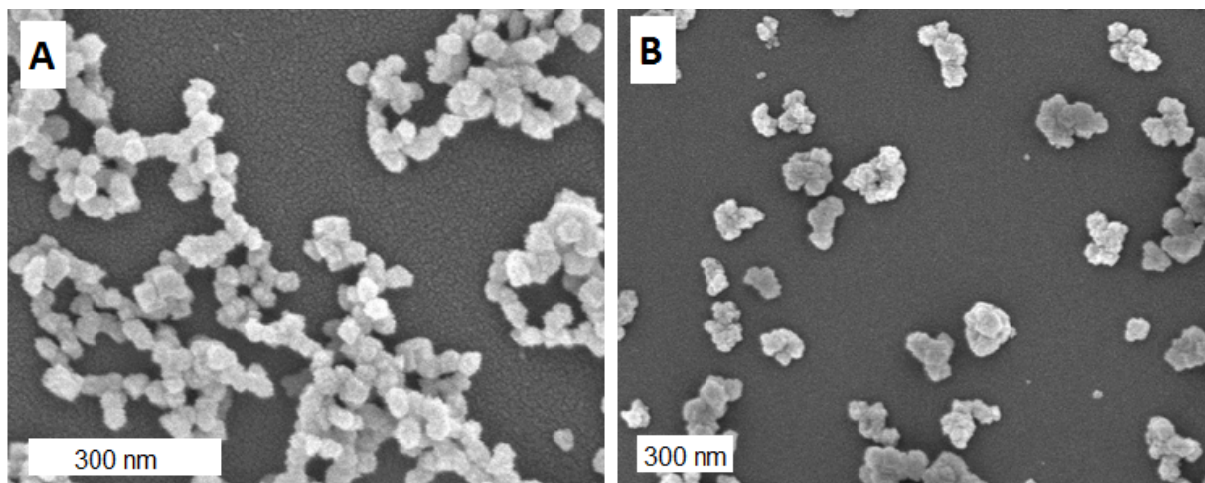

**Figure S3.** SEM images of (A) **Hf-UiO@SiO<sub>2</sub>** and (B) **Hf-UiO@SiO<sub>2</sub>@PEG**.

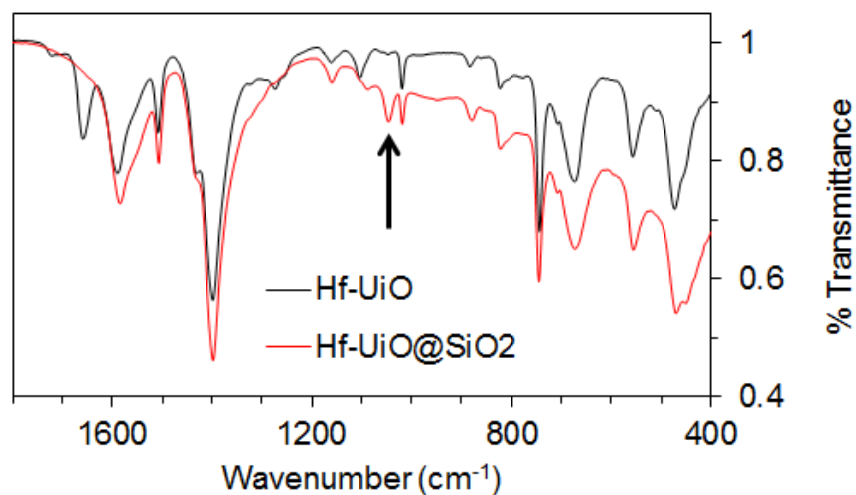

**Figure S4.** IR spectra of **Hf-UiO** and **Hf-UiO@SiO<sub>2</sub>**. The arrow indicates the peak coming from SiO<sub>2</sub>.

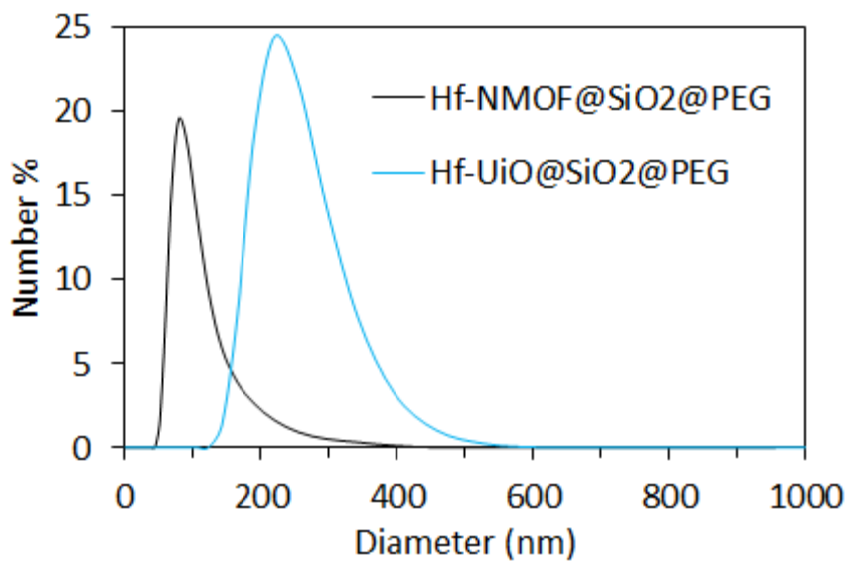

**Figure S5.** DLS size distribution by number of **Hf-NMOF@SiO<sub>2</sub>@PEG** in 10 mM PBS.

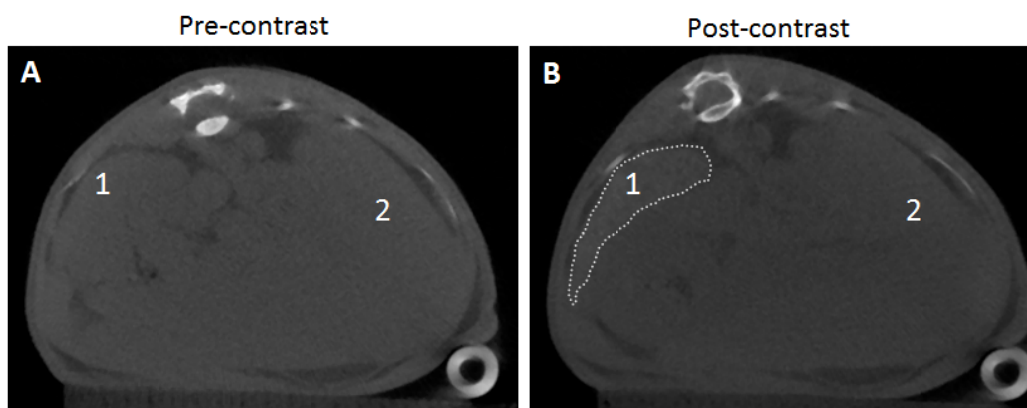

**Figure S6.** Axial CT slices of a mouse (A) pre-contrast and (B) 15 min after injection of **Hf-NMOF@SiO<sub>2</sub>@PEG** (2.0 mg Hf). The labels are: 1-spleen, 2-liver. The spleen, which showed a 101 HU increase in attenuation, is outlined. The attenuation in the liver increased by 41 HU, but the increase is not visually obvious.
